# Supplementary material
Source: PubMed Central journal article supplement (PMC8493612)
Supplement: d-75-00772-sup1.pdf [file d-75-00772-sup1.pdf]

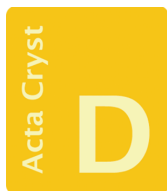

STRUCTURAL  
BIOLOGY

**Volume 75 (2019)**

**Supporting information for article:**

**Structure determination of the CAMP factor of *Streptococcus agalactiae* with the aid of an MBP tag and insights into membrane-surface attachment**

**Yajuan Li, Weihong Zeng, Yuelong Li, Weirong Fan, Huan Ma, Xiaojiao Fan, Jiansheng Jiang, Eric Brefo-Mensah, Yuzhu Zhang, Meixiang Yang, Zhongjun Dong, Michael Palmer and Tengchuan Jin**

**Table S1** Statistics of X-ray diffraction data.

|                                                 | Native CAMP                      | Se-M CAMP                                     | Native MBP-CAMP1          | Se-M MBP-CAMP1               | Native MBP-CAMP2          | Iodinated MBP-CAMP2       |
|-------------------------------------------------|----------------------------------|-----------------------------------------------|---------------------------|------------------------------|---------------------------|---------------------------|
| Data set                                        | TJ35-15                          | TJ37-5                                        | TJ71-6                    | TJ77-8                       | TJ86-3                    | TJ92-10                   |
| CAMP sequence                                   | A29-K255                         | A29-K255                                      | N42-K255                  | N42-K255                     | S43-K255                  | S43-K255                  |
| Space group                                     | P2 <sub>1</sub> 2 <sub>1</sub> 2 | I2 <sub>1</sub> 2 <sub>1</sub> 2 <sub>1</sub> | P6 <sub>5</sub> 22        | P6 <sub>5</sub> 22           | P6 <sub>5</sub> 22        | P1                        |
| Unit cell (a, b, c) (Å)                         | 90.98, 116.21,<br>72.93          | 51.05, 160.43,<br>171.84                      | 145.64, 145.64,<br>156.38 | 145.65,<br>145.65,<br>156.42 | 145.26, 145.26,<br>157.47 | 148.47, 149.61,<br>149.77 |
| (a, b, $\gamma$ ) (°)                           | 90, 90, 90                       | 90, 90, 90                                    | 90, 90, 120               | 90, 90, 120                  | 90, 90, 120               | 60.22 89.88 89.75         |
| Wavelength (Å)                                  | 1.033                            | 0.97944                                       | 1.033                     | 0.97944                      | 1.033                     | 1.033                     |
| Resolution (last shell) (Å)                     | 50-2.45 (2.60-2.45)              | 50-3.80 (4.03-3.80)                           | 50-3.00 (3.18-3.00)       | 50-3.20 (3.40-3.20)          | 50-3.15 (3.34-3.15)       | 50-3.10 (3.15-3.10)       |
| No of reflections (total/unique)                | 152348/28921                     | 27096/6549                                    | 419717/20079              | 226478/16562                 | 242055/17472              | 198982/9855               |
| Completeness (last shell) (%)                   | 99.6 (99.0)                      | 89.1 (83.3)                                   | 99.5 (99.7)               | 99.0 (99.5)                  | 99.7 (98.6)               | 98.9 (98.5)               |
| Redundancy (last shell)                         | 5.3 (5.2)                        | 4.1 (3.6)                                     | 20.9 (21.4)               | 13.7 (14.4)                  | 13.5 (13.7)               | 3.6 (3.6)                 |
| I/ $\sigma$ (I) (last shell)                    | 20.4 (2.3)                       | 9.1 (1.6)                                     | 32.0 (1.9)                | 20.5 (1.8)                   | 19.2 (1.6)                | 9.7 (1.3)                 |
| R <sub>meas</sub> (last shell) (%) <sup>†</sup> | 6.0 (84.1)                       | 9.8 (106.1)                                   | 6.3 (195.9)               | 7.9 (155.3)                  | 11.1 (219.0)              | 7.9 (90.5)                |
| CC(1/2)                                         | 99.9 (78.4)                      | 99.9 (80.4)                                   | 100.0 (77.5)              | 99.9 (73.4)                  | 100.0 (69.6)              | N/A                       |
